# Supplementary material
Source: publisher figshare collection journal article supplement (https://acs.figshare.com/ndownloader/files/3895717)
Supplement: Supplementary file 1 [file 3895717]

## Supplemental Figures

### Impact of Polymers on the Precipitation Behavior of Highly Supersaturated Aqueous Danazol Solutions

Authors: Jackson, Matthew; Toth, Scott; Kestur, Umesh; Huang, Jun; Qian, Feng; Hussain, Munir; Simpson, Garth; Taylor, Lynne

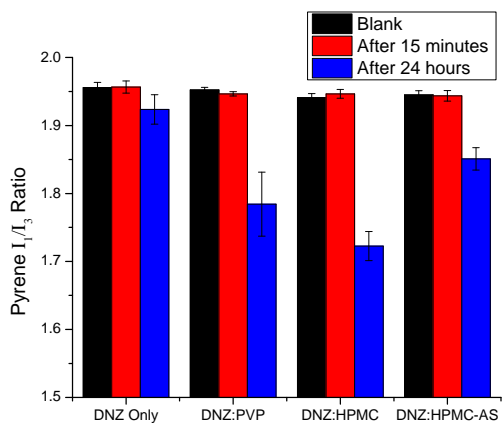

**Supplemental Figure 1.** Pyrene emission fluorescence ratios for solutions containing crystalline danazol.
